# Supplementary material for: Importance of favourable non-covalent contacts in the stereoselective synthesis of tetrasubstituted chromanones
Source: Royal Society of Chemistry journal article supplement (doi:10.1039/d2qo00090c), 2022-01-01
Supplement: d2qo00090c2.pdf [file d2qo00090c2.pdf]

## Supporting Information

# Importance of Favourable Non-Covalent Contacts in the Stereoselective Synthesis of Tetrasubstituted Chromanones

Laura R. Andreola and Steven E. Wheeler\*

*Department of Chemistry, University of Georgia, Athens, GA 30602*

*E-mail: : swheele2@uga.edu*

### Contents

|                                                                                                                                                                                                                           |       |
|---------------------------------------------------------------------------------------------------------------------------------------------------------------------------------------------------------------------------|-------|
| Table S1. TS energies (E), enthalpies (H), quasi-RRHO free energies (G), and single point electronic energies (E') for ligand <b>1c</b> in Hartrees.                                                                      | S2    |
| Table S2. Energy decomposition analysis model single point electronic energies (E') in Hartrees.                                                                                                                          | S3    |
| Table S3. TS energies (E), enthalpies (H), quasi-RRHO free energies (G), and single point electronic energies (E') for ligands <b>1a</b> , <b>1b</b> , <b>1d</b> , and <b>1e</b> in Hartrees.                             | S3-S4 |
| Table S4. Energies (E), enthalpies (H), quasi-RRHO free energies (G), and single point electronic energies (E') for intermediate <b>5</b> using ligand <b>1c</b> in Hartrees.                                             | S4    |
| Table S5. Energies (E), enthalpies (H), quasi-RRHO free energies (G), and single point electronic energies (E') for ligand <b>1c</b> bound to PdCl <sub>2</sub> and unbound in open and closed conformations in Hartrees. | S4    |
| Table S6. NBO charge transfer energies for interactions in <b>Figure S2</b> in kcal mol <sup>-1</sup> .                                                                                                                   | S5    |
| Table S7. Energies (E), enthalpies (H), quasi-RRHO free energies (G), and single point electronic energies (E') for intermediate <b>4</b> for all ligands                                                                 | S5    |
| Figure S1. Models for energy decomposition analysis                                                                                                                                                                       | S8    |
| Figure S2. TS-1c(S) and TS-1c(R) with NBO charge transfer interactions shown.                                                                                                                                             | S9    |

**Table S1.** TS energies (E), enthalpies (H), quasi-RRHO free energies (G), and single point electronic energies (E') for ligand **1c** in Hartrees.

| Structure  | E            | H            | G(quasi-RRO) | E'           |
|------------|--------------|--------------|--------------|--------------|
| TS(R)(2)   | -2230.916377 | -2230.214822 | -2230.344131 | -2231.630802 |
| TS(R)(1)   | -2230.935233 | -2230.233462 | -2230.362862 | -2231.611808 |
| TS(R)(3)   | -2230.915029 | -2230.213431 | -2230.344367 | -2231.610595 |
| TS(R)(4)   | -2230.916320 | -2230.214816 | -2230.344560 | -2231.611684 |
| TS(R)(5)   | -2230.912486 | -2230.210940 | -2230.342210 | -2231.608903 |
| TS(R)(6)   | -2230.923036 | -2230.221156 | -2230.351930 | -2231.619431 |
| TS(R)(7)   | -2230.926896 | -2230.225325 | -2230.353977 | -2231.620966 |
| TS(R)(8)   | -2230.931888 | -2230.229887 | -2230.359380 | -2231.626568 |
| TS(R)(9)   | -2230.935583 | -2230.233862 | -2230.363119 | -2231.632683 |
| TS(R)(10)  | -2230.934042 | -2230.232370 | -2230.361442 | -2231.631293 |
| TS(R)(11)  | -2230.934042 | -2230.232370 | -2230.361440 | -2231.631292 |
| TS(R)(12)  | -2230.935584 | -2230.233861 | -2230.363114 | -2231.632685 |
| TS(R)(13)* | -2230.936676 | -2230.234735 | -2230.363846 | -2231.633801 |
| TS(R)(14)  | -2230.926513 | -2230.225241 | -2230.355771 | -2231.624573 |
| TS(R)(15)  | -2230.931047 | -2230.229095 | -2230.359022 | -2231.626326 |
| TS(R)(16)  | -2230.924828 | -2230.223490 | -2230.353681 | -2231.622231 |
| TS(R)(17)  | -2230.924828 | -2230.223489 | -2230.353677 | -2231.622231 |
| TS(R)(18)  | -2230.924083 | -2230.222445 | -2230.352770 | -2231.618854 |
| TS(R)(19)  | -2230.921368 | -2230.219811 | -2230.350067 | -2231.617134 |
| TS(R)(20)  | -2230.923937 | -2230.222391 | -2230.352879 | -2231.621317 |
| TS(S)(1)   | -2230.925879 | -2230.223923 | -2230.354170 | -2231.621037 |
| TS(S)(2)   | -2230.927224 | -2230.225646 | -2230.356033 | -2231.623421 |
| TS(S)(3)   | -2230.927177 | -2230.225644 | -2230.356132 | -2231.623231 |
| TS(S)(4)   | -2230.935793 | -2230.233759 | -2230.364211 | -2231.631619 |
| TS(S)(5)   | -2230.923284 | -2230.221312 | -2230.351885 | -2231.619074 |
| TS(S)(6)   | -2230.925341 | -2230.223920 | -2230.354345 | -2231.622853 |
| TS(S)(7)*  | -2230.947480 | -2230.245374 | -2230.374472 | -2231.641792 |
| TS(S)(8)   | -2230.925341 | -2230.223920 | -2230.354341 | -2231.622853 |
| TS(S)(9)   | -2230.947480 | -2230.245371 | -2230.374455 | -2231.641789 |
| TS(S)(10)  | -2230.932990 | -2230.231021 | -2230.361066 | -2231.629974 |
| TS(S)(11)  | -2230.927177 | -2230.225644 | -2230.356150 | -2231.623230 |
| TS(S)(12)  | -2230.936591 | -2230.235011 | -2230.364667 | -2231.632007 |
| TS(S)(13)  | -2230.936592 | -2230.235011 | -2230.364663 | -2231.632007 |
| TS(S)(14)  | -2230.926570 | -2230.225202 | -2230.355734 | -2231.624553 |
| TS(S)(15)  | -2230.926544 | -2230.225161 | -2230.355806 | -2231.624509 |
| TS(S)(16)  | -2230.927224 | -2230.225646 | -2230.356035 | -2231.623421 |

\* Lowest energy structures TS(R) and TS(S)

**Table S2.** Energy decomposition analysis model single point electronic energies (E') in Hartrees.

| Model             | E'           |
|-------------------|--------------|
| TS(R) ligand      | -1336.723137 |
| TS(S) ligand      | -1336.725773 |
| TS(R) imine model | -1083.022557 |
| TS(S) imine model | -1083.024408 |
| TS(R) Cl model    | -2384.087757 |
| TS(S) Cl model    | -2384.091099 |
| TS(R) without Ph  | -1921.822956 |
| TS(S) without Ph  | -1921.828816 |
| TS(R) without Bn  | -1882.490651 |
| TS(S) without Bn  | -1882.494620 |

**Table S3.** TS energies (E), enthalpies (H), quasi-RRHO free energies (G), and single point electronic energies (E') for ligands **1a**, **1b**, **1d**, and **1e** in Hartrees.

| Structure             | E            | H            | G(quasi-RRHO) | E'           |
|-----------------------|--------------|--------------|---------------|--------------|
| <b>1a</b> TS(R) TS1.1 | -1702.149508 | -1701.512904 | -1701.625039  | -1702.667883 |
| <b>1a</b> TS(R) TS1.2 | -1702.145283 | -1701.508578 | -1701.620761  | -1702.662996 |
| <b>1a</b> TS(R) TS2.1 | -1702.149587 | -1701.512785 | -1701.624173  | -1702.665818 |
| <b>1a</b> TS(R) TS2.2 | -1702.147195 | -1701.510348 | -1701.621914  | -1702.663501 |
| <b>1a</b> TS(R) TS2.6 | -1702.148633 | -1701.512335 | -1701.624779  | -1702.666508 |
| <b>1a</b> TS(R) TS2.8 | -1702.141554 | -1701.504754 | -1701.616404  | -1702.659332 |
| <b>1a</b> TS(S) TS1.1 | -1702.150820 | -1701.514571 | -1701.627625  | -1702.669351 |
| <b>1a</b> TS(S) TS1.3 | -1702.149168 | -1701.512744 | -1701.624515  | -1702.667108 |
| <b>1a</b> TS(S) TS1.4 | -1702.147986 | -1701.511498 | -1701.624240  | -1702.666582 |
| <b>1a</b> TS(S) TS1.5 | -1702.149284 | -1701.512903 | -1701.625913  | -1702.667974 |
| <b>1a</b> TS(S) TS2.1 | -1702.153429 | -1701.516819 | -1701.628605  | -1702.671282 |
| <b>1a</b> TS(S) TS2.2 | -1702.149413 | -1701.512866 | -1701.625295  | -1702.667329 |
| <b>1a</b> TS(S) TS2.5 | -1702.150311 | -1701.513897 | -1701.625304  | -1702.668511 |
| <b>1a</b> TS(S) TS2.9 | -1702.150453 | -1701.513978 | -1701.625902  | -1702.668935 |
| <b>1b</b> TS(R) TS1.1 | -2039.183649 | -2038.538163 | -2038.659894  | -2039.818593 |
| <b>1b</b> TS(R) TS1.2 | -2039.181501 | -2038.535976 | -2038.656881  | -2039.814306 |
| <b>1b</b> TS(R) TS1.4 | -2039.181123 | -2038.536003 | -2038.657510  | -2039.814853 |
| <b>1b</b> TS(R) TS1.5 | -2039.180080 | -2038.534964 | -2038.656123  | -2039.813179 |
| <b>1b</b> TS(R) TS2.1 | -2039.184719 | -2038.539275 | -2038.660121  | -2039.816713 |
| <b>1b</b> TS(R) TS2.2 | -2039.182635 | -2038.537045 | -2038.657866  | -2039.814788 |
| <b>1b</b> TS(R) TS2.4 | -2039.184952 | -2038.539506 | -2038.660149  | -2039.818307 |
| <b>1b</b> TS(R) TS2.5 | -2039.180404 | -2038.535266 | -2038.655923  | -2039.812702 |
| <b>1b</b> TS(R) TS2.6 | -2039.184271 | -2038.539168 | -2038.660376  | -2039.817566 |
| <b>1b</b> TS(R) TS2.8 | -2039.177282 | -2038.531735 | -2038.652529  | -2039.810691 |
| <b>1b</b> TS(S) TS1.1 | -2039.185457 | -2038.540311 | -2038.662432  | -2039.820125 |
| <b>1b</b> TS(S) TS1.3 | -2039.184165 | -2038.538878 | -2038.659718  | -2039.817940 |

|                        |              |              |              |              |
|------------------------|--------------|--------------|--------------|--------------|
| <b>1b</b> TS(S) TS1.4  | -2039.182701 | -2038.537439 | -2038.659616 | -2039.817617 |
| <b>1b</b> TS(S) TS1.5  | -2039.184002 | -2038.538798 | -2038.661079 | -2039.819124 |
| <b>1b</b> TS(S) TS1.7  | -2039.188608 | -2038.543185 | -2038.664906 | -2039.822468 |
| <b>1b</b> TS(S) TS2.1  | -2039.187367 | -2038.541878 | -2038.663043 | -2039.821939 |
| <b>1b</b> TS(S) TS2.2  | -2039.183268 | -2038.537858 | -2038.659670 | -2039.817670 |
| <b>1b</b> TS(S) TS2.5  | -2039.184378 | -2038.539061 | -2038.659692 | -2039.819391 |
| <b>1b</b> TS(S) TS2.6  | -2039.188137 | -2038.542968 | -2038.664416 | -2039.823262 |
| <b>1d</b> TS(R) TS1.1  | -2309.568906 | -2308.805814 | -2308.941106 | -2310.292924 |
| <b>1d</b> TS(R) TS1.2  | -2309.568073 | -2308.805068 | -2308.940116 | -2310.292073 |
| <b>1d</b> TS(R) TS1.4  | -2309.565157 | -2308.802135 | -2308.937257 | -2310.289027 |
| <b>1d</b> TS(R) TS1.6  | -2309.564211 | -2308.801056 | -2308.935492 | -2310.288014 |
| <b>1d</b> TS(S) TS1.1  | -2309.578962 | -2308.815876 | -2308.951385 | -2310.300788 |
| <b>1d</b> TS(S) TS1.2  | -2309.578468 | -2308.815289 | -2308.950176 | -2310.300191 |
| <b>1e</b> TS(R) TS1.10 | -2506.151573 | -2505.237850 | -2505.388548 | -2506.941548 |
| <b>1e</b> TS(R) TS1.16 | -2506.138482 | -2505.225103 | -2505.376111 | -2506.928379 |
| <b>1e</b> TS(R) TS1.17 | -2506.137217 | -2505.223599 | -2505.374619 | -2506.926855 |
| <b>1e</b> TS(R) TS1.1  | -2506.155196 | -2505.241759 | -2505.392837 | -2506.945622 |
| <b>1e</b> TS(R) TS1.7  | -2506.145620 | -2505.232131 | -2505.383150 | -2506.935572 |
| <b>1e</b> TS(S) TS1.1  | -2506.169370 | -2505.255732 | -2505.406613 | -2506.957425 |
| <b>1e</b> TS(S) TS1.2  | -2506.168406 | -2505.254575 | -2505.405297 | -2506.956380 |
| <b>1e</b> TS(S) TS1.7  | -2506.159649 | -2505.245949 | -2505.396789 | -2506.947307 |
| <b>1e</b> TS(S) TS1.8  | -2506.158690 | -2505.245071 | -2505.396298 | -2506.946504 |
| <b>1e</b> TS(S) TS1.9  | -2506.157299 | -2505.243512 | -2505.394443 | -2506.945049 |

**Table S4.** Energies (E), enthalpies (H), quasi-RRHO free energies (G), and single point electronic energies (E') for intermediate **5** using ligand **1c** in Hartrees.

| Structure          | E            | H            | G (quasi RRHO) | E'           |
|--------------------|--------------|--------------|----------------|--------------|
| <b>5(R)</b> open   | -2230.957016 | -2230.253433 | -2230.3859450  | -2231.656155 |
| <b>5(R)</b> closed | -2230.962193 | -2230.258942 | -2230.392075   | -2231.660959 |
| <b>5(S)</b> open   | -2230.954397 | -2230.250908 | -2230.383865   | -2231.653175 |
| <b>5(S)</b> closed | -2230.963013 | -2230.259541 | -2230.391923   | -2231.660260 |

**Table S5.** Energies (E), enthalpies (H), quasi-RRHO free energies (G), and single point electronic energies (E') for ligand **1c** bound to PdCl<sub>2</sub> and unbound in open and closed conformations in Hartrees.

| Structure                                   | E            | H            | G (quasi RRHO) | E'           |
|---------------------------------------------|--------------|--------------|----------------|--------------|
| <b>1c</b> -PdCl <sub>2</sub> open gas phase | -2383.538908 | -2383.096526 | -2383.199138   | -2384.058886 |
| <b>1c</b> -PdCl <sub>2</sub> open solution  | -2383.573462 | -2383.131168 | -2383.233991   | -2384.094381 |
| <b>1c</b> -PdCl <sub>2</sub> closed         | -2383.537215 | -2383.095296 | -2383.198867   | -2384.058112 |

|                                              |              |              |              |              |
|----------------------------------------------|--------------|--------------|--------------|--------------|
| gas phase                                    |              |              |              |              |
| <b>1c</b> -PdCl <sub>2</sub> closed solution | -2383.574875 | -2383.132741 | -2383.235925 | -2384.096132 |
| <b>1c</b> -free open gas phase               | -1336.295738 | -1335.865312 | -1335.963372 | -1336.717526 |
| <b>1c</b> -free open solvent                 | -1336.307061 | -1335.876880 | -1335.974533 | -1336.731117 |
| <b>1c</b> -free closed gas phase             | -1336.295582 | -1335.865292 | -1335.962976 | -1336.716557 |
| <b>1c</b> -free closed solvent               | -1336.307583 | -1335.877490 | -1335.975330 | -1336.730856 |

**Table S6.** NBO charge transfer energies for interactions in **Figure S2** in kcal mol<sup>-1</sup>.

| Donor NBO                 | Acceptor NBO | E TS(R) | E TS(S) |
|---------------------------|--------------|---------|---------|
| BD (1) C63 – H82          | LP* (5) Pd37 | 3.33    | 3.16    |
| BD (1) C63 – H82          | LP* (6) Pd37 | 4.45    | 3.12    |
| BD (1) C16 – H18          | LP* (5) Pd37 | 0.91    | 0.39    |
| BD (1) C16 – H18          | LP* (6) Pd37 | 0.46    | 0.74    |
| BD (1) C16 – H18          | LP* (7) Pd37 | 0.06    | 0.00    |
| BD (1) C16 – H18          | LP* (8) Pd37 | 1.52    | 0.73    |
| Total contribution to Pd: |              | 10.73   | 8.14    |

**Table S7.** Energies (E), enthalpies (H), quasi-RRHO free energies (G), and single point electronic energies (E') for intermediate **4** for all ligands.

| Structure   | E            | H            | G (quasi RRHO) | E'           |
|-------------|--------------|--------------|----------------|--------------|
| <b>4-1a</b> | -1702.184846 | -1701.546856 | -1701.663542   | -1702.702502 |
| <b>4-1b</b> | -2039.218079 | -2038.571237 | -2038.697650   | -2039.852365 |
| <b>4-1c</b> | -2230.975884 | -2230.272304 | -2230.405548   | -2231.671767 |
| <b>4-1d</b> | -2309.608573 | -2308.843892 | -2308.982794   | -2310.330963 |
| <b>4-1e</b> | -2506.197346 | -2505.282156 | -2505.436458   | -2506.985707 |

The difference in the activation energy between the lowest energy transition state structures leading to the R and S products is attributed to the combination of stabilizing interaction energy and destabilizing distortion energy differences.

$$\Delta\Delta E^\ddagger = \Delta\Delta E_{int.} + \Delta\Delta E_{dist.} \quad (1)$$

The interaction and distortion components are further divided based on the molecular fragments in the system. “Ph” refers to the anionic phenyl being added to the chromane, while “C” refers to the chromane, and “S” refers to the forming complex of Ph and C as a single substrate fragment. “L” and “Pd” refer to the ligand and the palladium respectively.

$$\begin{aligned} \Delta\Delta E^\ddagger = & \Delta\Delta E_{L-Pd\ int.} + \Delta\Delta E_{L-Ph\ int.} + \Delta\Delta E_{L-C\ int.} + \Delta\Delta E_{Pd-Ph\ int.} + \\ & \Delta\Delta E_{Pd-C\ int.} + \Delta\Delta E_{Ph-C\ int.} + \Delta\Delta E_{L\ dist.} + \Delta\Delta E_{C\ dist.} + \Delta\Delta E_{Ph\ dist.} + \\ & \Delta\Delta E_{Pd\ dist.} \end{aligned} \quad (2)$$

The term we are interested in solving for is the relative interaction energy between the ligand and the forming complex S. To find this we must reduce the terms to expressions that can be computed. Many terms can be grouped together to give energy expressions that can be easily computed using model systems. The first of these is a model used to compute the relative distortion of the Pd-S complex (Figure S1a) by performing an EDA on the system where the ligand in the TS has been replaced with a di-imine.

$$\begin{aligned} \Delta\Delta E_{im.-Pd-S} = & \Delta\Delta E_{Pd\ dist.} + \Delta\Delta E_{C\ dist.} + \Delta\Delta E_{Ph\ dist.} + \Delta\Delta E_{Pd-Ph\ int.} \\ & + \Delta\Delta E_{Pd-C\ int.} + \Delta\Delta E_{Ph-C\ int.} + \Delta\Delta E_{im.-Pd\ int.} \\ & + \Delta\Delta E_{im.S\ int.} + \Delta\Delta E_{im.dist.} \end{aligned} \quad (3)$$

This expression is simplified by eliminating the terms involving the imine groups, as they are negligibly small.

$$\begin{aligned} \Delta\Delta E_{im.-Pd-S} = & \Delta\Delta E_{Pd\ dist.} + \Delta\Delta E_{C\ dist.} + \Delta\Delta E_{Ph\ dist.} + \Delta\Delta E_{Pd-Ph\ int.} \\ & + \Delta\Delta E_{Pd-C\ int.} + \Delta\Delta E_{Ph-C\ int.} \end{aligned} \quad (4)$$

This leaves an expression that includes six of the terms in equation (2) and can be easily computed. This term therefore constitutes the relative Pd-S distortion. Substituting into equation (2) gives:

$$\begin{aligned} \Delta\Delta E^\ddagger = & \Delta\Delta E_{L-Pd\ int.} + \Delta\Delta E_{L-Ph\ int.} + \Delta\Delta E_{L-C\ int.} + \Delta\Delta E_{L\ dist.} \\ & + \Delta\Delta E_{im.-Pd-S} \end{aligned} \quad (5)$$

The first term will be computed using the model in Figure S1b in which the substrates have been replaced by chlorines which are then optimized, conserving the transition state geometry of the L-Pd complex. Another energy decomposition is performed on this smaller system to isolate the relative L-Pd interaction energy.

$$\begin{aligned} \Delta\Delta E_{L-Pd-2Cl} = & \Delta\Delta E_{L-Pd\ int.} + \Delta\Delta E_{L\ dist.} + \Delta\Delta E_{L-2Cl\ int.} + \Delta\Delta E_{Pd-2Cl\ int.} \\ & + \Delta\Delta E_{Cl(1)-Cl(2)\ int.} + \Delta\Delta E_{Cl(1)\ dist.} + \Delta\Delta E_{Cl(2)\ dist.} \\ & + \Delta\Delta E_{Pd\ dist.} \end{aligned} \quad (6)$$

All terms but the first two are considered negligible, and the expression can be solved for  $\Delta\Delta E_{L-Pd\ int.}$  to give an expression composed of two computable terms.

$$\Delta\Delta E_{L-Pd\ int.} = \Delta\Delta E_{L-Pd-2Cl} - \Delta\Delta E_{L\ dist.} \quad (7)$$

Substituting into equation (1) gives:

$$\Delta\Delta E^\ddagger = \Delta\Delta E_{L-Pd-2Cl} + \Delta\Delta E_{L-Ph\ int.} + \Delta\Delta E_{L-C\ int.} + \Delta\Delta E_{im.-Pd-S} \quad (8)$$

We can now combine the final unknown terms into the interaction of the ligand with the substrate. This does not include the interaction of the substrates with each other (effectively the relative bond energy) as we have already accounted for that in equation (4).

$$\Delta\Delta E^\ddagger = \Delta\Delta E_{L-Pd-2Cl} + \Delta\Delta E_{L-S\ int.} + \Delta\Delta E_{im.-Pd-S} \quad (9)$$

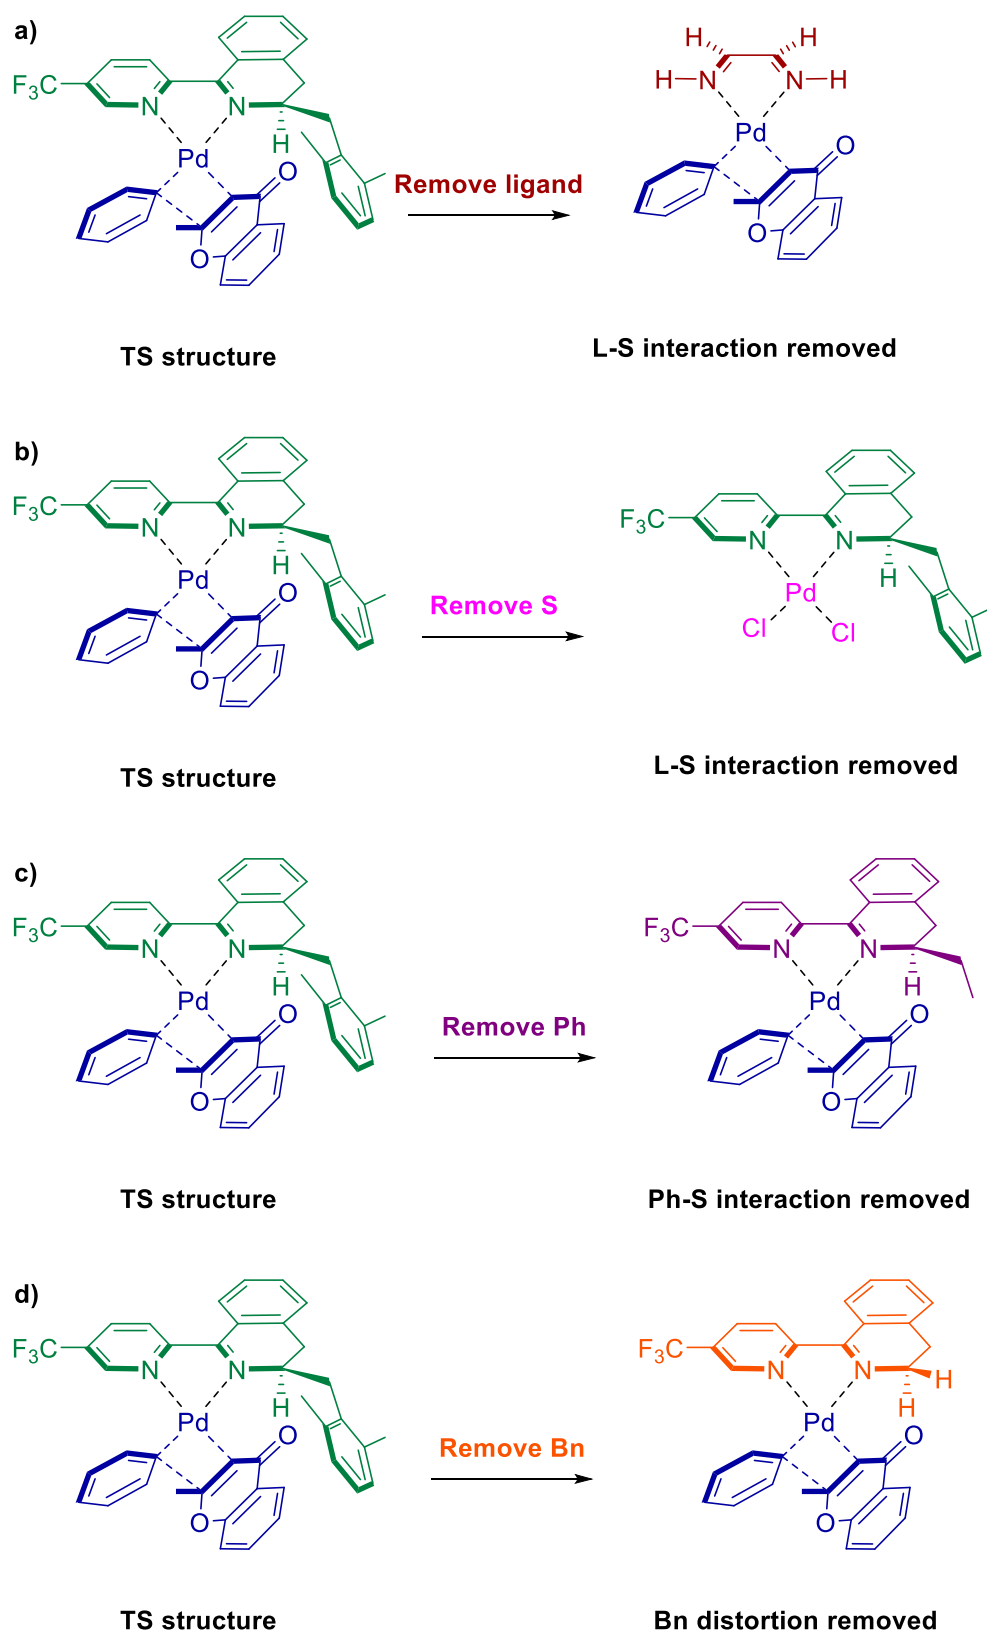

**Figure S1:** Models for energy decomposition analysis



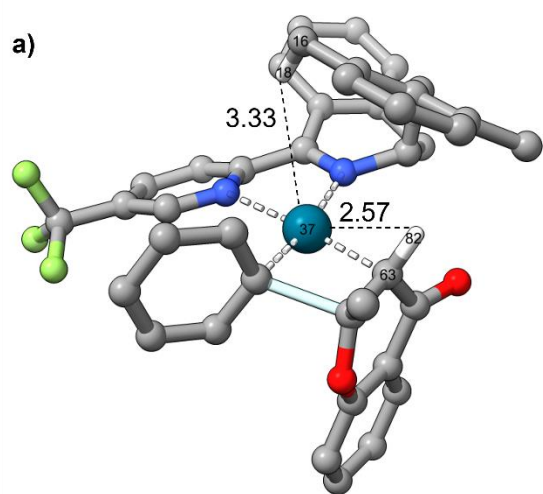

**TS-1c(S)** (major)  
 $\Delta\Delta G^\ddagger = 0.0$

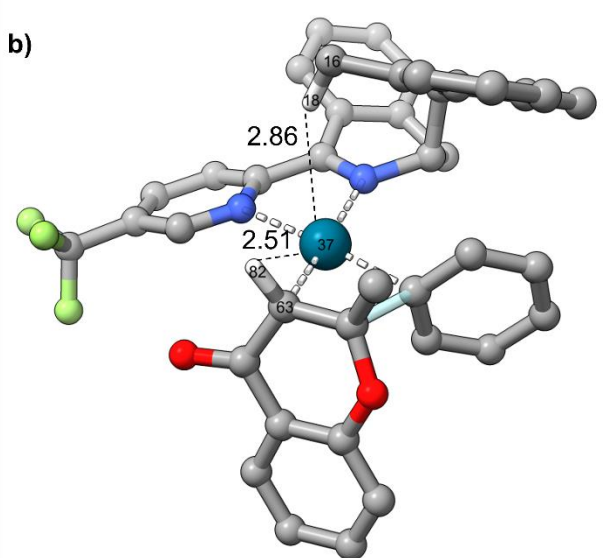

**TS-1c(R)** (minor)  
 $\Delta\Delta G^\ddagger = 5.1$

**Figure S2:** TS-1c(S) and TS-1c(R) with NBO charge transfer interactions shown. Select hydrogens shown for clarity.
